# Supplementary material for: Strengthened H2O adsorption and photogenerated carrier separation: surface C-coupled hydroxylation of g-C3N4 photocatalysts for efficient H2 production
Source: Royal Society of Chemistry journal article supplement (doi:10.1039/d3ta07832a), 2024-01-01
Supplement: d3ta07832a1.pdf [file d3ta07832a1.pdf]

## **Supplementary Information**

### **Strengthen H<sub>2</sub>O adsorption and photogenerated carrier separation: Surface C-coupled hydroxylation of g-C<sub>3</sub>N<sub>4</sub> photocatalysts for the efficient H<sub>2</sub> production**

Jun Hu, Lixu Wu, Hongyin Liu, Chun Sun, Syed Aamir Hussain, Fei-  
peng Jiao\*, Yaochi Liu\*

School of Chemistry and Chemical Engineering, Central South  
University, Changsha 410083, People's Republic of China

**\*Corresponding author address:**

**Prof. & Dr. Feipeng Jiao**

School of Chemistry and Chemical Engineering, Central South University, Changsha  
410083, China

**E-mail:** [jiaofp@163.com](mailto:jiaofp@163.com)

**Prof. & Dr. Yaochi Liu**

School of Chemistry and Chemical Engineering, Central South University, Changsha  
410083, China

**E-mail:** [liuyaochi72@163.com](mailto:liuyaochi72@163.com)

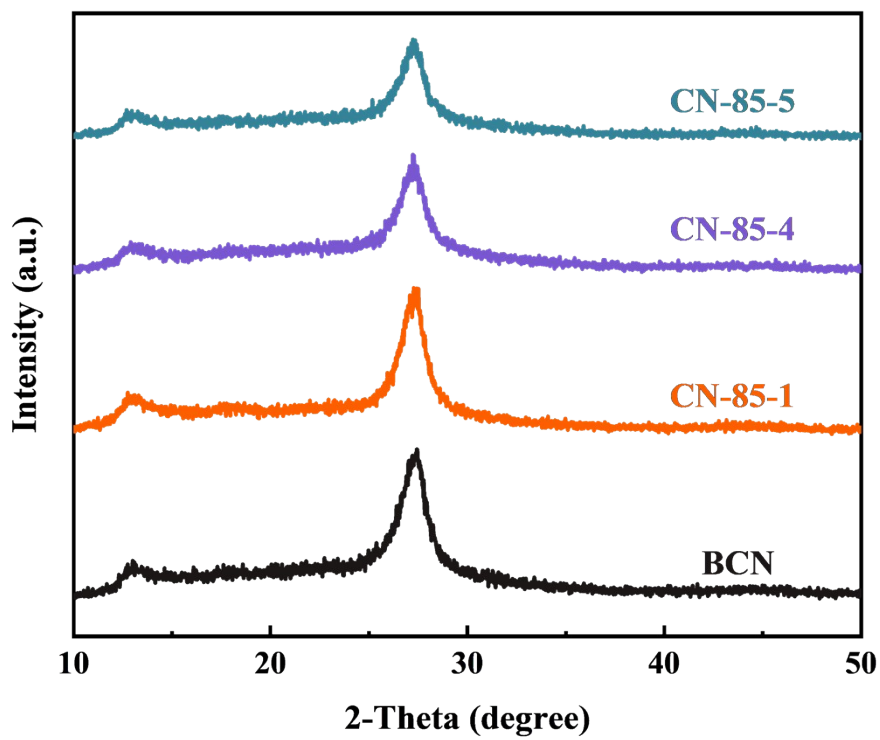

Figure S1. The XRD patterns of BCN, CN-85-1, CN-85-4, and CN-85-5.

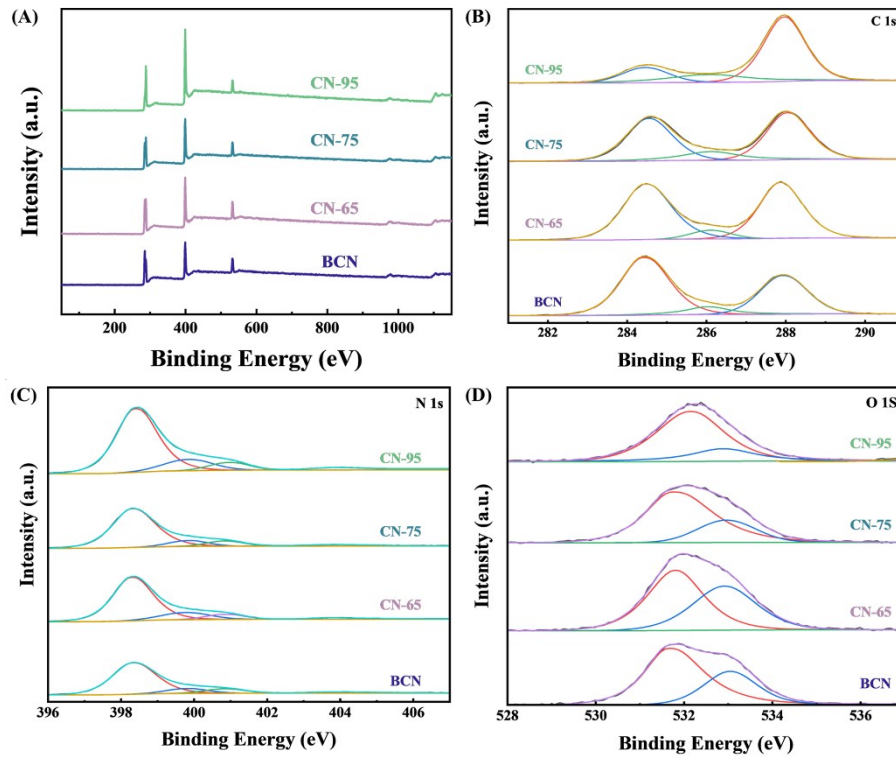

Figure S2. (A) XPS survey, (B) C 1s spectra, (C) N 1s spectra, and (D) O 1s spectra of BCN, CN-65, CN-75, and CN-95.

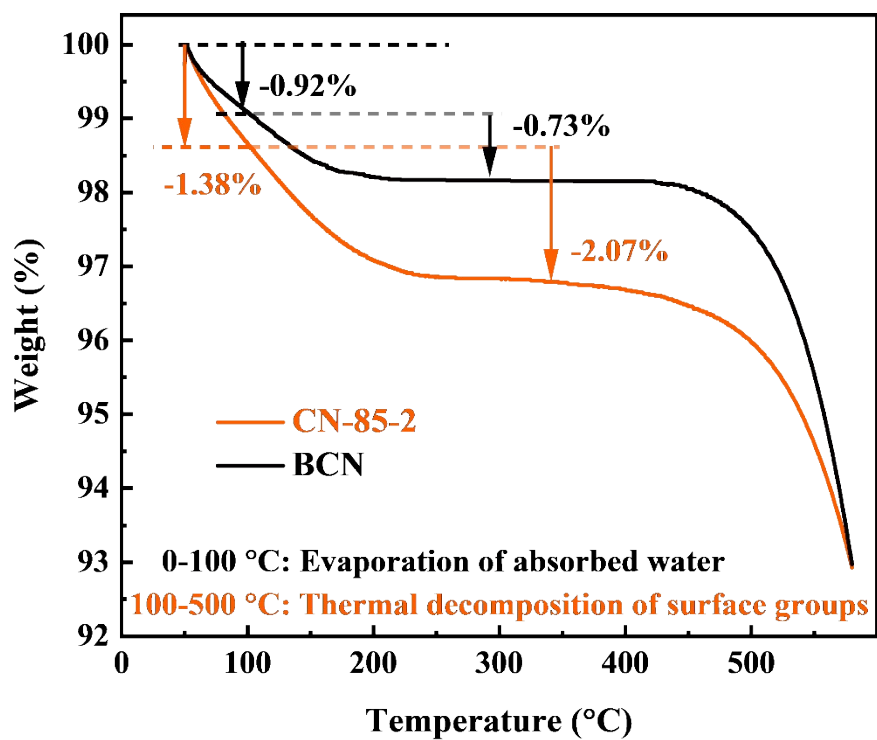

Figure S3. TGA curves of BCN and CN-85-2.

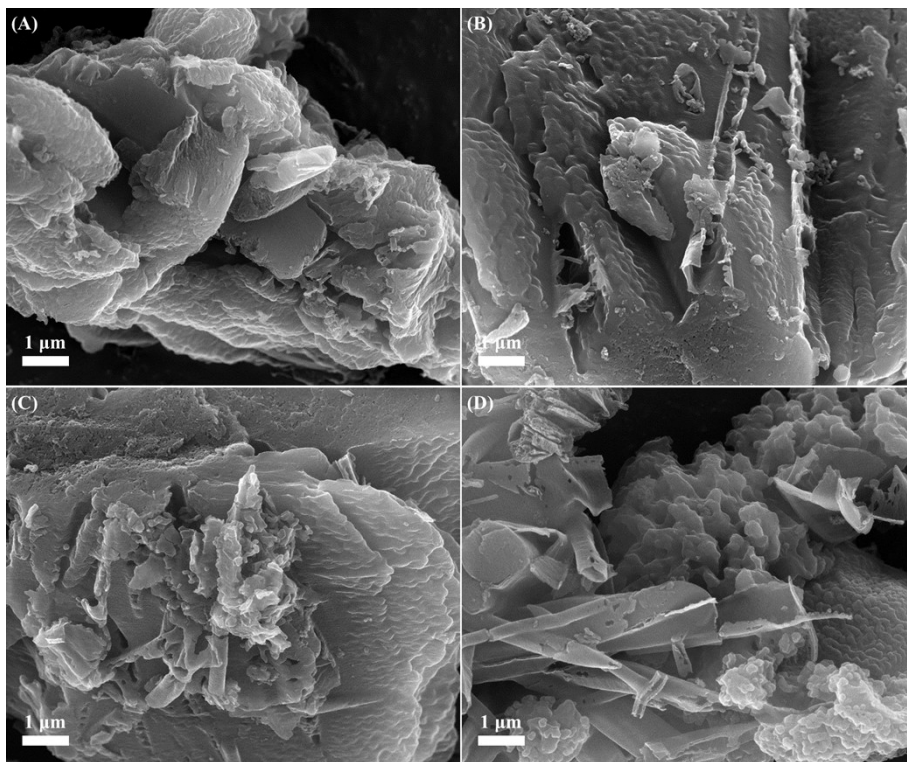

Figure S4. SEM images of (A) CN-65, (B) CN-75, (C) CN-85-3, and (D) CN-95.

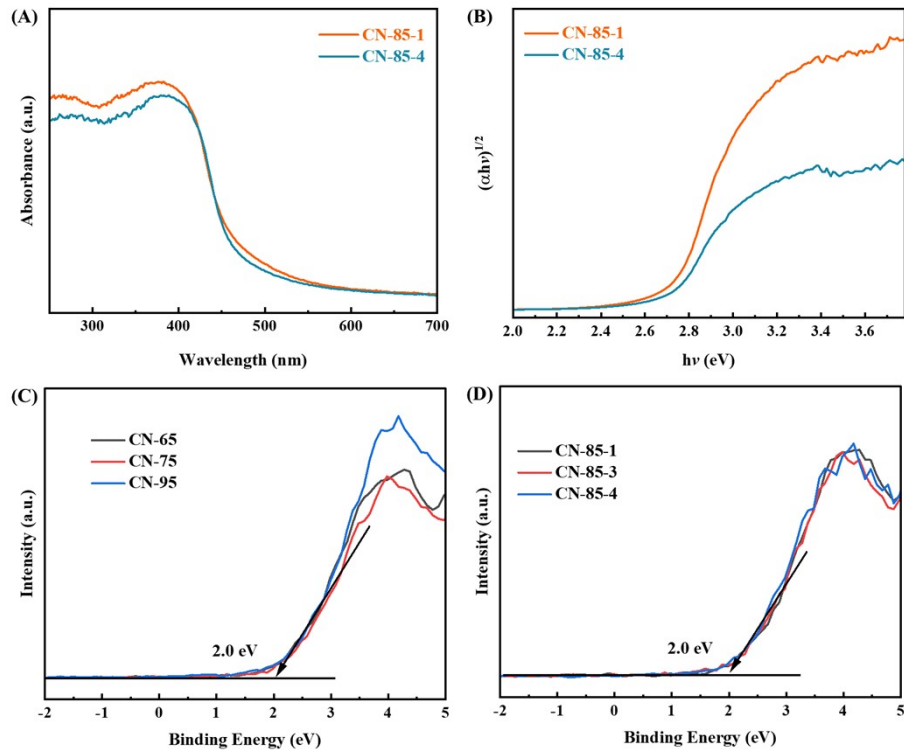

Figure S5. (A) UV-vis spectrum and (B) Tauc plots of CN-85-1 and CN-85-4. (C) XPS-VB curves of CN-65, CN-75, and CN-95. (D) XPS-VB spectra of CN-85-1, CN-85-3, and CN-85-4.

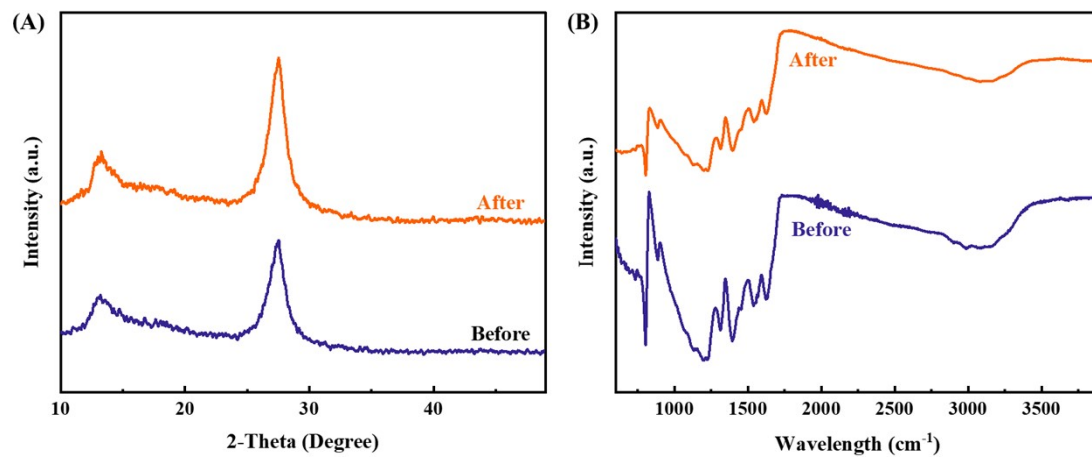

Figure S6. (A) XRD patterns and (B) FT-IR spectrum of the as-used CN-85-2 sample before and after four cycles of photocatalytic hydrogen evolution.

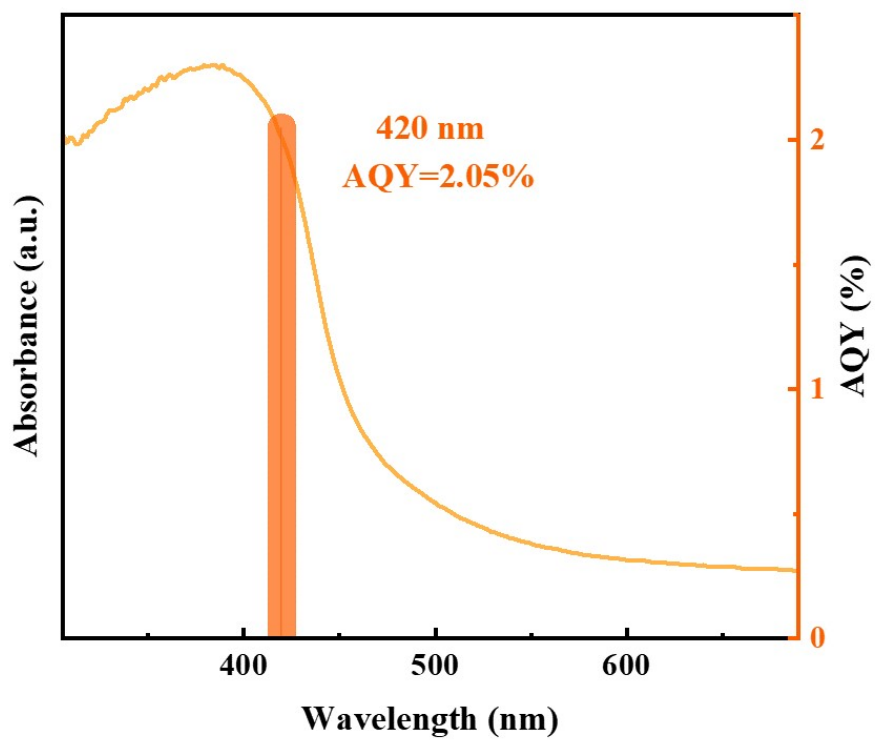

Figure S7. Apparent quantum yield of the CN-85-2 at a wavelength of 420 nm.



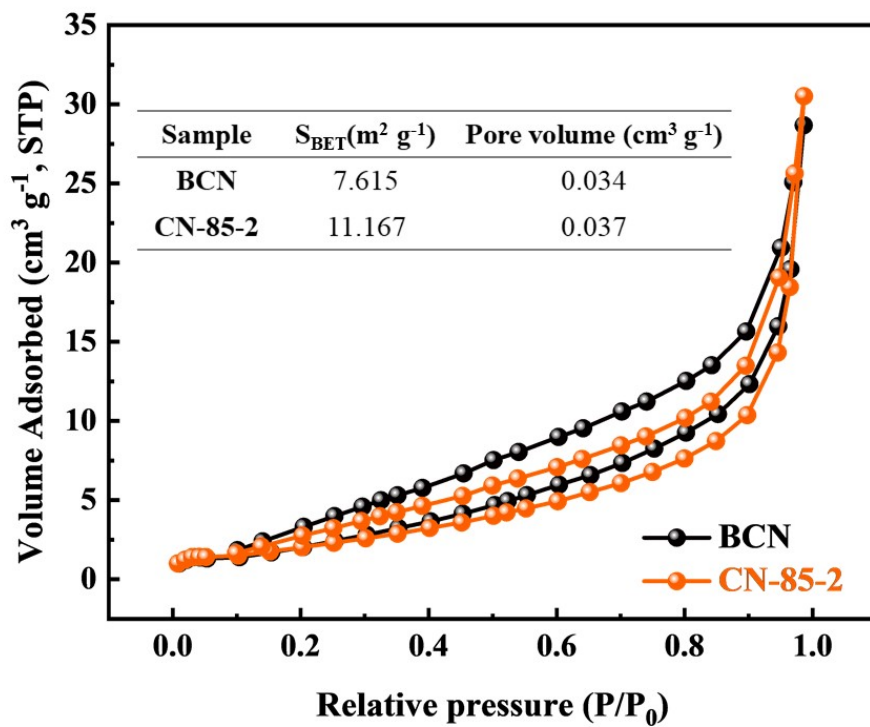

Figure S8.  $\text{N}_2$  adsorption-desorption isotherms and specific surface areas of BCN and CN-85-2.

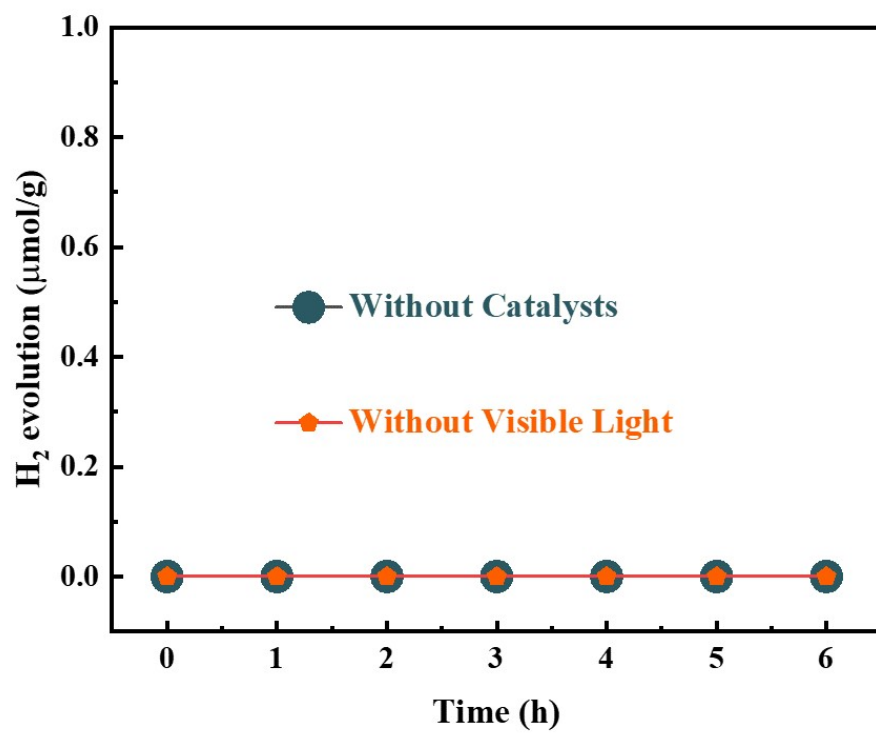

Figure S9. The hydrogen evolution efficiency without catalysts and without visible light irradiation.

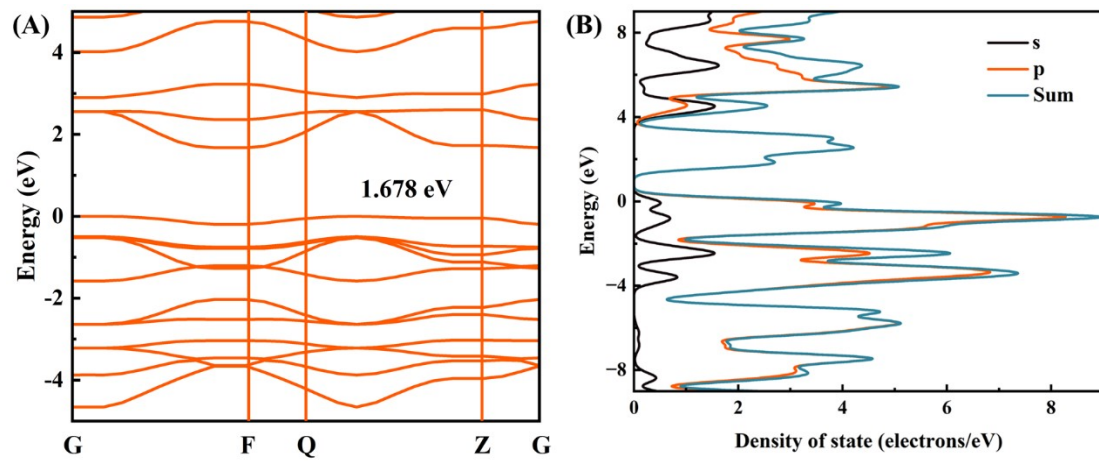

Figure S10. Band structure (A) and PDOS analysis (B) of BCN.

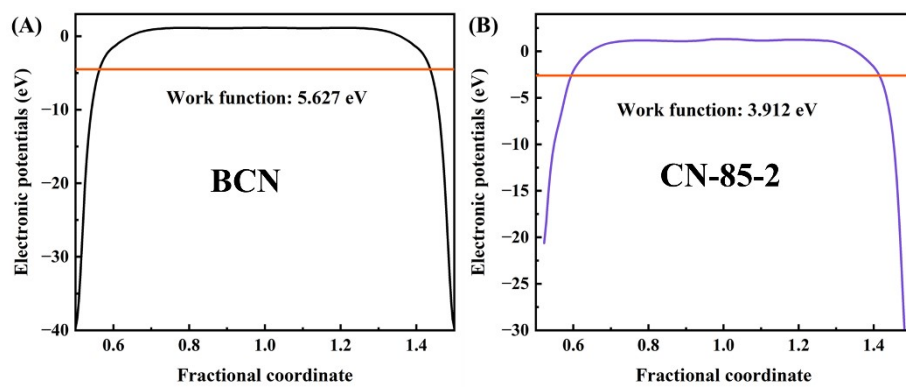

Figure S11. Work function of BCN (A) and CN-85-2 (B).

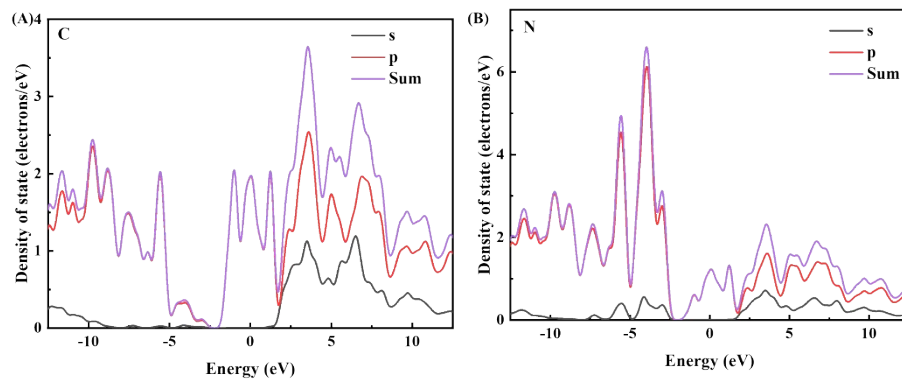

Figure S12. Corresponding PDOS of C and N over g-C<sub>3</sub>N<sub>4</sub>-85-2.

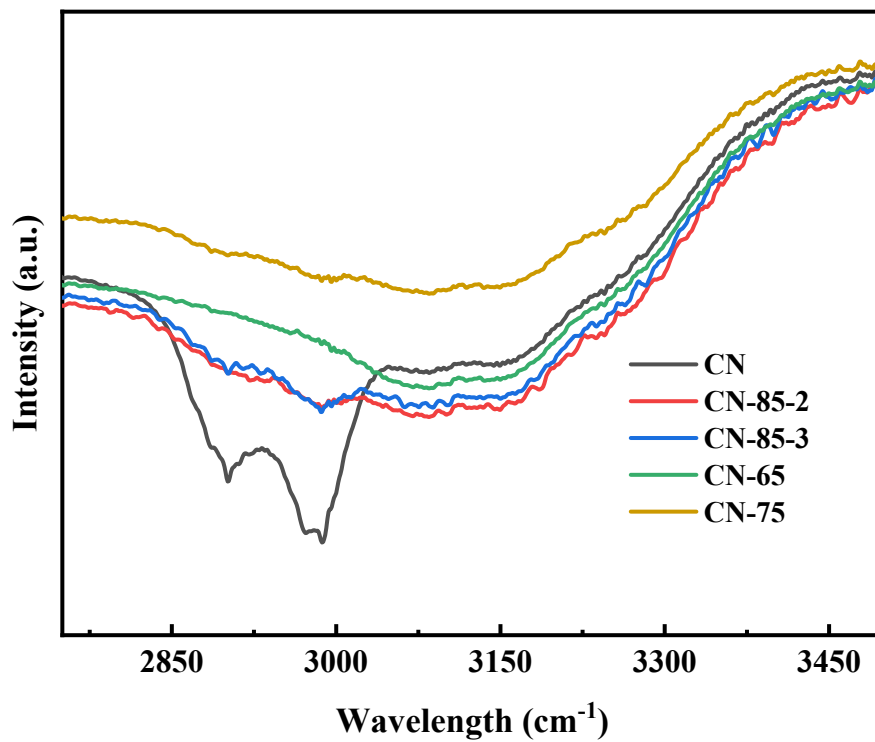

Figure S13. FT-IR spectra of materials between 2750 to 3500 cm<sup>-1</sup>.

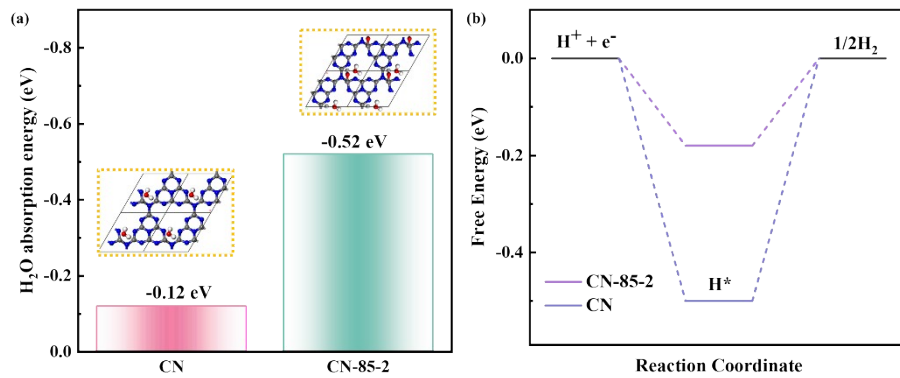

Figure S14. (a) The adsorption energies of  $H_2O$  on CN and CN-85-2 surface, and (b) free energy profiles for H adsorption at CN and CN-85-2 samples.

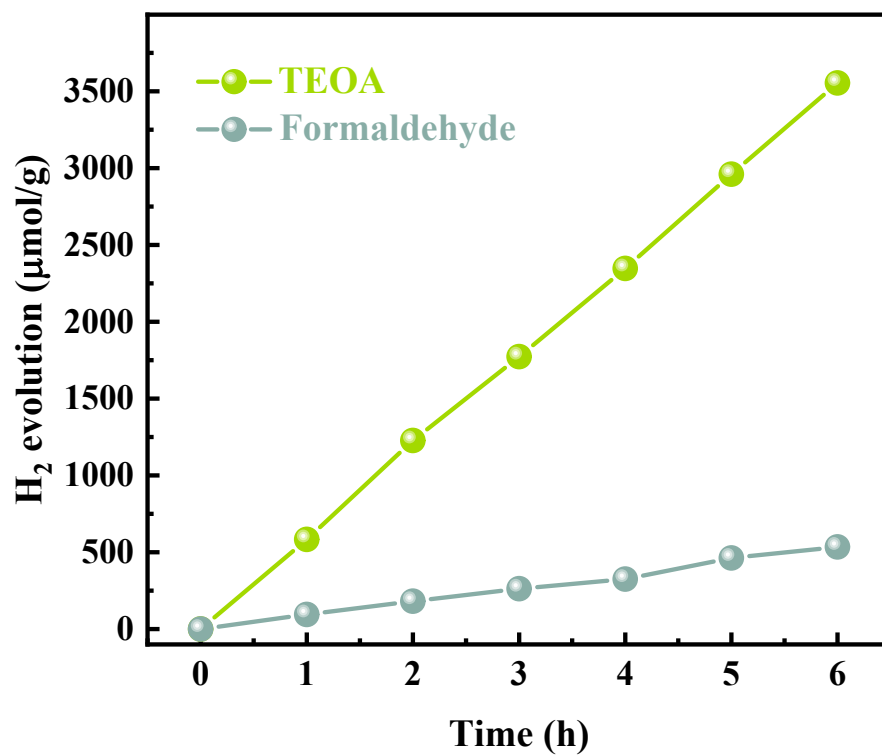

Figure S15. The photocatalytic hydrogen evolution of CN-85-2 sample in TEOA and formaldehyde solution.



Table S1. Zeta potential of BCN, CN-65, CN-75, CN-85-2, and CN-95.

| <b>Samples</b>             | <b>BCN</b> | <b>CN-65</b> | <b>CN-75</b> | <b>CN-85-</b> | <b>CN-95</b> |
|----------------------------|------------|--------------|--------------|---------------|--------------|
| <b>Zeta potential (mV)</b> | -24.4      | -25.6        | -28          | -28           | -28.7        |

Table S2. The weight ratios in BCN, CN-65, CN-75, CN-85-2, and CN-95 according to the EDS analysis.

| <b>Samples</b> | <b>C (wt. %)</b> | <b>N (wt. %)</b> | <b>O (wt. %)</b> |
|----------------|------------------|------------------|------------------|
| <b>BCN</b>     | 43.73            | 53.84            | 2.42             |
| <b>CN-65</b>   | 42.76            | 52.72            | 4.53             |
| <b>CN-75</b>   | 43.73            | 51.84            | 4.42             |
| <b>CN-85-2</b> | 41.91            | 52.77            | 5.32             |
| <b>CN-95</b>   | 42.23            | 54.10            | 3.67             |

Table S3. The atomic ratios in pristine BCN and formaldehyde-treated g-C<sub>3</sub>N<sub>4</sub> at 85 °C for 2 h.

| <b>Samples</b> | <b>C (atom %)</b> | <b>N (atom%)</b> | <b>O (atom%)</b> |
|----------------|-------------------|------------------|------------------|
| <b>CN</b>      | 42.62             | 54.82            | 2.56             |
| <b>CN-85-2</b> | 40.35             | 54.69            | 4.96             |

Table S4. Comparison of the present photocatalytic hydrogen evolution to the other CN-based photocatalysts in previous literatures.

| Catalysts                              | Light Source                        | Reaction Conditions                         | AQY            | H <sub>2</sub> Evolution Rate ( $\mu\text{mol g}^{-1} \text{h}^{-1}$ ) | Reference         |
|----------------------------------------|-------------------------------------|---------------------------------------------|----------------|------------------------------------------------------------------------|-------------------|
| <b>CN/Formaldehyde-85-2</b>            | 300 W Xe lamp, $\lambda > 400$ nm   | Aqueous (100 mL, 10 vol.% TEOA), 3 wt% Pt   | 2.05% (420 nm) | 592                                                                    | This work         |
| <b>PC-CN</b>                           | 300 W Xe lamp, $\lambda > 420$ nm   | Aqueous (100 mL, 10 vol.% TEOA)             | 4.83% (420 nm) | 1010                                                                   | [S <sup>1</sup> ] |
| <b>C-Ti/CN</b>                         | 300 W Xe lamp, $\lambda > 420$ nm   | Aqueous (100 mL, 10 vol.% TEOA), 2 wt% Pt   | 6.14% (420 nm) | 1409                                                                   | [S <sup>2</sup> ] |
| <b>GD/g-C<sub>3</sub>N<sub>4</sub></b> | 350 W Xe lamp ( $\lambda > 420$ nm) | Aqueous (80 mL, 15 vol.% ethanol), 1 wt% Pt | 3.47% (420 nm) | 792                                                                    | [S <sup>3</sup> ] |
| <b>g-C<sub>3</sub>N<sub>4</sub></b>    | 300 W Xe lamp, $\lambda > 420$ nm   | Aqueous (100 mL, 10 vol.% TEOA), 3 wt% Pt   | 6.10% (420 nm) | 1391                                                                   | [S <sup>4</sup> ] |
| <b>Co/P/CN-sc</b>                      | 300 W Xe lamp, $\lambda > 420$ nm   | Aqueous (100 mL, 10 vol.% TEOA), 3 wt% Pt   | 1.53% (420 nm) | 350                                                                    | [S <sup>5</sup> ] |
| <b>UNU-C<sub>3</sub>N<sub>4</sub></b>  | 300 W Xe lamp, $\lambda > 420$ nm   | Aqueous (100 mL, 10 vol.% TEOA), 3 wt% Pt   | 3.64% (420 nm) | 830                                                                    | [S <sup>6</sup> ] |

|                                                                                          |                                           |                                                       |                    |      |      |
|------------------------------------------------------------------------------------------|-------------------------------------------|-------------------------------------------------------|--------------------|------|------|
| <b>N-<br/>vacancies<br/>CN</b>                                                           | 300 W Xe<br>lamp, $\lambda > 420$<br>nm   | Aqueous (100 mL,<br>10 vol.% TEOA), 3<br>wt% Pt       | 8.25%<br>(420 nm)  | 1880 | [S7] |
| <b>2D-2D g-<br/>C<sub>3</sub>N<sub>4</sub>/<br/>MoS<sub>2</sub></b>                      | 300 W Xe<br>lamp<br>( $\lambda > 420$ nm) | Aqueous (250 mL,<br>0.1 M TEOA)                       | 5.04%<br>(420 nm)  | 1155 | [S8] |
| <b>Ba<sub>5</sub>Nb<sub>4</sub>O<sub>15</sub><br/>/<br/>g-C<sub>3</sub>N<sub>4</sub></b> | 3W LEDs,<br>$\lambda > 420$ nm            | Aqueous (100 mL,<br>0.025 M oxalic acid),<br>2 wt% Pt | 11.71%<br>(420 nm) | 2673 | [S9] |

### References:

- S1. P. Wen, K. Zhao, H. Li, J. Li, J. Li, Q. Ma, Scott M. Geyer, L. Jiang and Y. Qiu, *J. Mater. Chem. A*, 2020, **8**, 2995-3004.
- S2. X. Han, L. An, Y. Hu, Y. Li, C. Hou, H. Wang and Q. Zhang, *Appl. Catal., B*, 2020, **265**, 118539.
- S3. Q. Xu, B. Zhu, B. Cheng, J. Yu, M. Zhou and W. Ho, *Appl. Catal., B*, 2019, **255**, 117770.
- S4. Y. Hong, E. Liu, J. Shi, X. Lin, L. Sheng, M. Zhang, L. Wang and J. Chen, *Int. J. Hydrogen Energy*, 2019, **44**, 7194-7204.
- S5. W. Li, W. Li, Z. Guo, Y. Song, S. Tang, Y. Ma, X. Xing and Q. Wang, *ACS Appl. Mater. Interfaces*, 2021, **13**, 52560-52570.
- S6. L. Jing, D. Wang, Y. Xu, M. Xie, J. Yan, M. He, Z. Song, H. Xu and H. Li, *J. Colloid Interface Sci.*, 2020, **566**, 171-182.
- S7. T. Yu, T. Xie, W. Zhou, Y. Zhang, Y. Chen, B. Shao, W.-Q. Guo and X. Tan, *ACS Sustainable Chem. Eng.*, 2021, **9**, 7529-7540.
- S8. Y.-J. Yuan, Z. Shen, S. Wu, Y. Su, L. Pei, Z. Ji, M. Ding, W. Bai, Y. Chen, Z.-T. Yu and Z. Zou, *Appl. Catal., B*, 2019, **246**, 120-128.
- S9. K. Wang, Y. Li, J. Li and G. Zhang, *Appl. Catal., B*, 2020, **263**, 117730.
